# Supplementary material for: Genospecies of Borrelia burgdorferi sensu lato detected in 16 mammal species and questing ticks from northern Europe
Source: PubMed Central journal article supplement (PMC6434031; doi:10.1038/s41598-019-41686-0), 2019-03-25
Supplement: 41598_2019_41686_MOESM1_ESM.pdf [file 41598_2019_41686_MOESM1_ESM.pdf]

# **Genospecies of *Borrelia burgdorferi* sensu lato detected in 16 mammal species and questing ticks from northern Europe**

Atle Mysterud, Vetle M. Stigum, Ryanne I. Jaarsma, and Hein Sprong

## **Supplementary Information**

Content:

- Supplementary Table 1

**Supplementary Table 1.** An overview of Genbank Accession Numbers and sequences linked to genospecies used for comparison to determine genospecies in our current sample.

| <b>Genbank Accession number</b> | <b>Country</b> | <b>Strain information</b>                                                       | <b>Genospecies</b> |
|---------------------------------|----------------|---------------------------------------------------------------------------------|--------------------|
| AB189458                        | Serbia         | Borrelia afzelii DNA, 5S-23S rRNA intergenic spacer, partial sequence.          | afzelii            |
| AF090971                        | Slovakia       | Borrelia burgdorferi strain MIL internal transcribed spacer 2, complete seq.    | burgdorferi        |
| AF090972                        | Germany        | Borrelia burgdorferi strain Z136 internal transcribed spacer 2, complete seq.   | burgdorferi        |
| AF090973                        | Switzerland    | Borrelia burgdorferi strain NE271 internal transcribed spacer 2, complete seq.  | burgdorferi        |
| AF090974                        | Switzerland    | Borrelia burgdorferi strain NE99 internal transcribed spacer 2, complete seq.   | burgdorferi        |
| AF090975                        | Denmark        | Borrelia burgdorferi strain DK7 internal transcribed spacer 2, complete seq.    | burgdorferi        |
| AF090976                        | Spain          | Borrelia burgdorferi strain Esp1 internal transcribed spacer 2, complete seq.   | burgdorferi        |
| AF090977                        | France         | Borrelia burgdorferi strain IP1 internal transcribed spacer 2, complete seq.    | burgdorferi        |
| AF090978                        | Italy          | Borrelia burgdorferi strain HII internal transcribed spacer 2, complete seq.    | burgdorferi        |
| AF090979                        | Austria        | Borrelia burgdorferi strain L5 internal transcribed spacer 2, complete seq.     | burgdorferi        |
| AF090980                        | Germany        | Borrelia burgdorferi strain 35B808 internal transcribed spacer 2, complete seq. | burgdorferi        |
| AF090981                        | Switzerland    | Borrelia burgdorferi strain NE56 internal transcribed spacer 2, complete seq.   | burgdorferi        |
| AF090982                        | France         | Borrelia burgdorferi strain 20006 internal transcribed spacer 2, complete seq.  | burgdorferi        |
| AF090983                        | Switzerland    | Borrelia sp. NE581 internal transcribed spacer 2, complete sequence.            | burgdorferi        |
| AF090984                        | Switzerland    | Borrelia sp. NE49 internal transcribed spacer 2, complete sequence.             | burgdorferi        |
| AF090985                        | Russia         | Borrelia sp. Ir-3519 internal transcribed spacer 2, complete sequence.          | burgdorferi        |
| AF497979                        | Czech Republic | Borrelia burgdorferi genotype A26 5S-23S ribosomal RNA intergenic spacer region | burgdorferi        |
| AF497980                        | Czech Republic | Borrelia burgdorferi genotype I-181 5S-23S ribosomal RNA intergenic spacer regi | burgdorferi        |
| AF497981                        | Czech Republic | Borrelia burgdorferi genotype I-208 5S-23S ribosomal RNA intergenic spacer regi | burgdorferi        |
| AF497982                        | Czech Republic | Borrelia afzelii genotype D-3 5S-23S ribosomal RNA intergenic spacer region, pa | afzelii            |
| AF497983                        | Czech Republic | Borrelia afzelii genotype I-2 5S-23S ribosomal RNA intergenic spacer region, pa | afzelii            |
| AF497985                        | Czech Republic | Borrelia valaisiana genotype D-2 5S-23S ribosomal RNA intergenic spacer region, | valaisiana         |

|          |                |                                                                                 |             |
|----------|----------------|---------------------------------------------------------------------------------|-------------|
| AF497986 | Czech Republic | Borrelia valaisiana genotype I-52 5S-23S ribosomal RNA intergenic spacer region | valaisiana  |
| AF497987 | Czech Republic | Borrelia valaisiana genotype I-30 5S-23S ribosomal RNA intergenic spacer region | valaisiana  |
| AF497988 | Czech Republic | Borrelia valaisiana genotype I-214 5S-23S ribosomal RNA intergenic spacer regio | valaisiana  |
| AF497989 | Czech Republic | Borrelia valaisiana genotype B-4 5S-23S ribosomal RNA intergenic spacer region, | valaisiana  |
| AF497994 | Czech Republic | Borrelia spielmanii 5S-23S ribosomal RNA intergenic spacer, partial sequence.   | spielmanii  |
| AF538271 | Russia         | Borrelia afzelii isolate 63 5S-23S ribosomal RNA intergenic spacer, partial seq | afzelii     |
| AM160603 | Germany        | Borrelia burgdorferi 5S-23S rRNA intergenic spacer, strain PSigII.              | spielmanii  |
| AM160604 | Germany        | Borrelia burgdorferi 5S-23S rRNA intergenic spacer, strain PHap.                | spielmanii  |
| AM160605 | Germany        | Borrelia burgdorferi 5S-23S rRNA intergenic spacer, strain PMew.                | spielmanii  |
| AM160606 | Germany        | Borrelia burgdorferi 5S-23S rRNA intergenic spacer, strain PMai.                | spielmanii  |
| AM160607 | Slovenia       | Borrelia burgdorferi 5S-23S rRNA intergenic spacer, strain PAnz.                | spielmanii  |
| AM160608 | Slovenia       | Borrelia burgdorferi 5S-23S rRNA intergenic spacer, strain PJes.                | spielmanii  |
| DQ111065 | Portugal       | Borrelia lusitaniae strain PotiB1 rrf-rrl intergenic spacer, partial sequence.  | lusitaniae  |
| DQ133526 | France         | Borrelia spielmanii strain PC-Eq17N5 rrf-rrl intergenic spacer, partial sequenc | spielmanii  |
| DQ133527 | France         | Borrelia spielmanii strain PC-Eq2/1W10 rrf-rrl intergenic spacer, partial seque | spielmanii  |
| DQ133528 | France         | Borrelia spielmanii strain PC-Eq2rN8 rrf-rrl intergenic spacer, partial sequenc | spielmanii  |
| DQ393307 | ?              | Borrelia burgdorferi strain Sh-2-82 rrf-rrl intergenic spacer, partial sequence | burgdorferi |
| DQ393308 | ?              | Borrelia burgdorferi strain 5LM218 rrf-rrl intergenic spacer, partial sequence. | burgdorferi |
| DQ517433 | Slovakia       | Borrelia garinii strain 6-2N10 5S-23S ribosomal RNA intergenic spacer, partial  | garinii     |
| DQ520861 | Slovakia       | Borrelia garinii strain 6-6L6 5S-23S ribosomal RNA intergenic spacer, partial s | garinii     |
| DQ520862 | Slovakia       | Borrelia garinii strain 6-6N1 5S-23S ribosomal RNA intergenic spacer, partial s | garinii     |
| DQ520863 | Slovakia       | Borrelia garinii strain 6-9N2 5S-23S ribosomal RNA intergenic spacer, partial s | garinii     |
| DQ520864 | Slovakia       | Borrelia garinii strain 6-16L1 5S-23S ribosomal RNA intergenic spacer, partial  | garinii     |
| DQ520865 | Slovakia       | Borrelia garinii strain 6-16N3 5S-23S ribosomal RNA intergenic spacer, partial  | garinii     |
| DQ520869 | Slovakia       | Borrelia garinii strain 248D 5S-23S ribosomal RNA intergenic spacer, partial se | garinii     |
| DQ520870 | Slovakia       | Borrelia garinii strain 453Y 5S-23S ribosomal RNA intergenic spacer, partial se | garinii     |
| DQ520871 | Slovakia       | Borrelia garinii strain 6-16N12 5S-23S ribosomal RNA intergenic spacer, partial | garinii     |
| DQ520872 | Slovakia       | Borrelia garinii strain 6-10N10 5S-23S ribosomal RNA intergenic spacer, partial | garinii     |
| DQ520873 | Slovakia       | Borrelia garinii strain 398D 5S-23S ribosomal RNA intergenic spacer, partial se | garinii     |
| DQ860257 | Italy          | Borrelia afzelii isolate TN1 rrf-rrl intergenic spacer and 23S ribosomal RNA ge | afzelii     |

|          |                |                                                                                    |             |
|----------|----------------|------------------------------------------------------------------------------------|-------------|
| DQ860258 | Italy          | Borrelia afzelii isolate TN2 rrf-rrl intergenic spacer and 23S ribosomal RNA ge    | afzelii     |
| DQ860259 | Italy          | Borrelia afzelii isolate TN4 rrf-rrl intergenic spacer and 23S ribosomal RNA ge    | afzelii     |
| DQ860260 | Italy          | Borrelia afzelii isolate TN5 rrf-rrl intergenic spacer and 23S ribosomal RNA ge    | afzelii     |
| DQ860262 | Italy          | Borrelia valaisiana isolate TN7 rrf-rrl intergenic spacer and 23S ribosomal RNA    | valaisiana  |
| DQ860263 | Italy          | Borrelia valaisiana isolate TN8 rrf-rrl intergenic spacer and 23S ribosomal RNA    | valaisiana  |
| DQ860264 | Italy          | Borrelia valaisiana isolate TN9 rrf-rrl intergenic spacer and 23S ribosomal RNA    | valaisiana  |
| DQ860265 | Italy          | Borrelia valaisiana isolate TN10 rrf-rrl intergenic spacer and 23S ribosomal RN    | valaisiana  |
| DQ860266 | Italy          | Borrelia garinii isolate TN12 rrf-rrl intergenic spacer and 23S ribosomal RNA g    | garinii     |
| DQ860267 | Italy          | Borrelia garinii isolate TN14 rrf-rrl intergenic spacer and 23S ribosomal RNA g    | garinii     |
| DQ860268 | Italy          | Borrelia garinii isolate TN16 rrf-rrl intergenic spacer and 23S ribosomal RNA g    | garinii     |
| DQ860269 | Italy          | Borrelia garinii isolate TN17 rrf-rrl intergenic spacer and 23S ribosomal RNA g    | garinii     |
| DQ860270 | Italy          | Borrelia garinii isolate TN18 rrf-rrl intergenic spacer and 23S ribosomal RNA g    | garinii     |
| DQ860271 | Italy          | Borrelia burgdorferi isolate TN19 rrf-rrl intergenic spacer and 23S ribosomal R    | burgdorferi |
| DQ860272 | Italy          | Borrelia burgdorferi isolate TN20 rrf-rrl intergenic spacer and 23S ribosomal R    | burgdorferi |
| DQ860273 | Italy          | Borrelia garinii isolate TN11 rrf-rrl intergenic spacer and 23S ribosomal RNA g    | garinii     |
| EF179598 | Portugal       | Borrelia lusitaniae strain PoHL1 5S-23S ribosomal RNA intergenic spacer, partia    | lusitaniae  |
| EF488984 | Russia         | Borrelia garinii strain Nov11106 5S-23S ribosomal RNA intergenic spacer,<br>partia | garinii     |
| EF647595 | Portugal       | Borrelia lusitaniae strain PoAnB1 rrf-rrl intergenic spacer, partial sequence.     | lusitaniae  |
| EU078961 | Portugal       | Borrelia lusitaniae strain PoTiB6 rrf-rrl intergenic spacer, partial sequence.     | lusitaniae  |
| EU401776 | Czech Republic | Borrelia garinii isolate TP 394/1 5S-23S ribosomal RNA intergenic spacer, parti    | garinii     |
| EU401777 | Czech Republic | Borrelia garinii isolate TP 65/1 5S-23S ribosomal RNA intergenic spacer, partia    | garinii     |
| EU401778 | Czech Republic | Borrelia garinii isolate TP 66/1 5S-23S ribosomal RNA intergenic spacer, partia    | garinii     |
| EU401779 | Czech Republic | Borrelia garinii isolate PM 72/2 5S-23S ribosomal RNA intergenic spacer, partia    | garinii     |
| EU401780 | Czech Republic | Borrelia garinii isolate PM 72/4 5S-23S ribosomal RNA intergenic spacer, partia    | garinii     |
| EU401781 | Czech Republic | Borrelia garinii isolate PM 72/5 5S-23S ribosomal RNA intergenic spacer, partia    | garinii     |
| FJ431126 | Czech Republic | Borrelia garinii isolate p1BgA 5S-23S ribosomal RNA intergenic spacer, partial     | garinii     |
| FJ431127 | Czech Republic | Borrelia garinii isolate p20Bg 5S-23S ribosomal RNA intergenic spacer, partial     | garinii     |

|          |                |                                                                                 |             |
|----------|----------------|---------------------------------------------------------------------------------|-------------|
| FJ431128 | Czech Republic | Borrelia burgdorferi isolate p2H12 5S-23S ribosomal RNA intergenic spacer, part | burgdorferi |
| FJ431129 | Czech Republic | Borrelia burgdorferi isolate p1f3 5S-23S ribosomal RNA intergenic spacer, parti | burgdorferi |
| FJ431130 | Czech Republic | Borrelia burgdorferi isolate p5d5 5S-23S ribosomal RNA intergenic spacer, parti | burgdorferi |
| FJ431131 | Czech Republic | Borrelia burgdorferi isolate p6f1 5S-23S ribosomal RNA intergenic spacer, parti | burgdorferi |
| FJ431132 | Czech Republic | Borrelia burgdorferi isolate p8g1 5S-23S ribosomal RNA intergenic spacer, parti | burgdorferi |
| FJ431133 | Czech Republic | Borrelia burgdorferi isolate p9g2 5S-23S ribosomal RNA intergenic spacer, parti | burgdorferi |
| FJ431134 | Czech Republic | Borrelia burgdorferi isolate p15h1 5S-23S ribosomal RNA intergenic spacer, part | burgdorferi |
| FJ431135 | Czech Republic | Borrelia burgdorferi isolate p16d1 5S-23S ribosomal RNA intergenic spacer, part | burgdorferi |
| FJ431136 | Czech Republic | Borrelia bissettii isolate p1c8 5S-23S ribosomal RNA intergenic spacer, partial | bissettii   |
| FJ431137 | Czech Republic | Borrelia bissettii isolate p2e4 5S-23S ribosomal RNA intergenic spacer, partial | bissettii   |
| FJ431138 | Czech Republic | Borrelia bissettii isolate p3h10 5S-23S ribosomal RNA intergenic spacer, partia | bissettii   |
| FJ431139 | Czech Republic | Borrelia bissettii isolate p9b3 5S-23S ribosomal RNA intergenic spacer, partial | bissettii   |
| FJ431140 | Czech Republic | Borrelia bissettii isolate p11a8 5S-23S ribosomal RNA intergenic spacer, partia | bissettii   |
| FJ431141 | Czech Republic | Borrelia bissettii isolate p13b1 5S-23S ribosomal RNA intergenic spacer, partia | bissettii   |
| FJ431142 | Czech Republic | Borrelia bissettii isolate p16a2 5S-23S ribosomal RNA intergenic spacer, partia | bissettii   |
| FJ546482 | France         | Borrelia afzelii strain IBS11 5S-23S ribosomal RNA intergenic spacer, partial s | afzelii     |
| FJ546483 | France         | Borrelia afzelii strain IBS12 5S-23S ribosomal RNA intergenic spacer, partial s | afzelii     |
| FJ546484 | France         | Borrelia afzelii strain IBS13 5S-23S ribosomal RNA intergenic spacer, partial s | afzelii     |
| FJ546485 | France         | Borrelia afzelii strain IPT109 5S-23S ribosomal RNA intergenic spacer, partial  | afzelii     |
| FJ546486 | France         | Borrelia afzelii strain IPT110 5S-23S ribosomal RNA intergenic spacer, partial  | afzelii     |
| FJ546487 | France         | Borrelia afzelii strain IPT118 5S-23S ribosomal RNA intergenic spacer, partial  | afzelii     |
| FJ546488 | France         | Borrelia afzelii strain IPT122 5S-23S ribosomal RNA intergenic spacer, partial  | afzelii     |

|          |          |                                                                                 |             |
|----------|----------|---------------------------------------------------------------------------------|-------------|
| FJ546489 | France   | Borrelia afzelii strain IPT138 5S-23S ribosomal RNA intergenic spacer, partial  | afzelii     |
| FJ546490 | France   | Borrelia afzelii strain IPT142 5S-23S ribosomal RNA intergenic spacer, partial  | afzelii     |
| FJ546491 | France   | Borrelia afzelii strain IPT154 5S-23S ribosomal RNA intergenic spacer, partial  | afzelii     |
| FJ546492 | France   | Borrelia afzelii strain IPT164 5S-23S ribosomal RNA intergenic spacer, partial  | afzelii     |
| FJ546493 | France   | Borrelia afzelii strain IPT179 5S-23S ribosomal RNA intergenic spacer, partial  | afzelii     |
| FJ546495 | Germany  | Borrelia bavariensis strain PFlk 5S-23S ribosomal RNA intergenic spacer, partia | bavariensis |
| FJ546496 | Slovenia | Borrelia bavariensis strain PTrob 5S-23S ribosomal RNA intergenic spacer, parti | bavariensis |
| FJ546497 | Austria  | Borrelia bavariensis strain PRab 5S-23S ribosomal RNA intergenic spacer, partia | bavariensis |
| FJ546498 | Germany  | Borrelia bavariensis strain POB 5S-23S ribosomal RNA intergenic spacer, partial | bavariensis |
| FJ546499 | France   | Borrelia garinii strain IPT28 5S-23S ribosomal RNA intergenic spacer, partial s | garinii     |
| FJ546500 | France   | Borrelia garinii strain IPT114 5S-23S ribosomal RNA intergenic spacer, partial  | garinii     |
| FJ546501 | France   | Borrelia garinii strain IPT130 5S-23S ribosomal RNA intergenic spacer, partial  | garinii     |
| FJ546502 | France   | Borrelia garinii strain IPT139 5S-23S ribosomal RNA intergenic spacer, partial  | garinii     |
| FJ546503 | France   | Borrelia garinii strain IPT140 5S-23S ribosomal RNA intergenic spacer, partial  | garinii     |
| FJ546504 | France   | Borrelia garinii strain IPT156 5S-23S ribosomal RNA intergenic spacer, partial  | garinii     |
| FJ546505 | France   | Borrelia garinii strain IPT157 5S-23S ribosomal RNA intergenic spacer, partial  | garinii     |
| FJ546506 | France   | Borrelia garinii strain IPT158 5S-23S ribosomal RNA intergenic spacer, partial  | garinii     |
| FJ546507 | France   | Borrelia garinii strain IPT165 5S-23S ribosomal RNA intergenic spacer, partial  | garinii     |
| FJ546508 | France   | Borrelia garinii strain IPT167 5S-23S ribosomal RNA intergenic spacer, partial  | garinii     |
| FJ546509 | France   | Borrelia garinii strain IPT168 5S-23S ribosomal RNA intergenic spacer, partial  | garinii     |
| FJ546510 | France   | Borrelia garinii strain IPT169 5S-23S ribosomal RNA intergenic spacer, partial  | garinii     |
| FJ546511 | France   | Borrelia garinii strain IPT171 5S-23S ribosomal RNA intergenic spacer, partial  | garinii     |
| FJ546512 | France   | Borrelia garinii strain IPT172 5S-23S ribosomal RNA intergenic spacer, partial  | garinii     |
| FJ546513 | France   | Borrelia garinii strain IPT178 5S-23S ribosomal RNA intergenic spacer, partial  | garinii     |
| FJ546514 | France   | Borrelia garinii strain IPT189 5S-23S ribosomal RNA intergenic spacer, partial  | garinii     |
| FJ546515 | France   | Borrelia valaisiana strain IPT29 5S-23S ribosomal RNA intergenic spacer, partia | valaisiana  |
| FJ546516 | France   | Borrelia valaisiana strain IPT31 5S-23S ribosomal RNA intergenic spacer, partia | valaisiana  |
| FJ546517 | France   | Borrelia valaisiana strain IPT33 5S-23S ribosomal RNA intergenic spacer, partia | valaisiana  |
| FJ546518 | France   | Borrelia valaisiana strain IPT47 5S-23S ribosomal RNA intergenic spacer, partia | valaisiana  |
| FJ546519 | France   | Borrelia valaisiana strain IPT85 5S-23S ribosomal RNA intergenic spacer, partia | valaisiana  |
| FJ546520 | France   | Borrelia valaisiana strain IPT102 5S-23S ribosomal RNA intergenic spacer, parti | valaisiana  |
| FJ546521 | France   | Borrelia valaisiana strain IPT111 5S-23S ribosomal RNA intergenic spacer, parti | valaisiana  |
| FJ546522 | France   | Borrelia valaisiana strain IPT121 5S-23S ribosomal RNA intergenic spacer, parti | valaisiana  |
| FJ546523 | France   | Borrelia valaisiana strain IPT144 5S-23S ribosomal RNA intergenic spacer, parti | valaisiana  |

|          |             |                                                                                    |             |
|----------|-------------|------------------------------------------------------------------------------------|-------------|
| FJ546524 | France      | Borrelia valaisiana strain IPT163 5S-23S ribosomal RNA intergenic spacer, parti    | valaisiana  |
| FJ546525 | France      | Borrelia valaisiana strain IPT166 5S-23S ribosomal RNA intergenic spacer, parti    | valaisiana  |
| FJ546526 | France      | Borrelia valaisiana strain IPT174 5S-23S ribosomal RNA intergenic spacer, parti    | valaisiana  |
| FJ546527 | France      | Borrelia valaisiana strain IPT177 5S-23S ribosomal RNA intergenic spacer, parti    | valaisiana  |
| FJ546528 | France      | Borrelia valaisiana strain IPT184 5S-23S ribosomal RNA intergenic spacer, parti    | valaisiana  |
| FJ546529 | France      | Borrelia valaisiana strain IPT186 5S-23S ribosomal RNA intergenic spacer, parti    | valaisiana  |
| FJ546530 | France      | Borrelia valaisiana strain IPT187 5S-23S ribosomal RNA intergenic spacer, parti    | valaisiana  |
| FJ546531 | France      | Borrelia valaisiana strain IPT188 5S-23S ribosomal RNA intergenic spacer, parti    | valaisiana  |
| FJ546532 | France      | Borrelia burgdorferi strain IPT2 5S-23S ribosomal RNA intergenic spacer, partia    | burgdorferi |
| FJ546533 | France      | Borrelia burgdorferi strain IPT19 5S-23S ribosomal RNA intergenic spacer, parti    | burgdorferi |
| FJ546534 | France      | Borrelia burgdorferi strain IPT23 5S-23S ribosomal RNA intergenic spacer, parti    | burgdorferi |
| FJ546535 | France      | Borrelia burgdorferi strain IPT39 5S-23S ribosomal RNA intergenic spacer, parti    | burgdorferi |
| FJ546536 | France      | Borrelia burgdorferi strain IPT58 5S-23S ribosomal RNA intergenic spacer, parti    | burgdorferi |
| FJ546537 | France      | Borrelia burgdorferi strain IPT69 5S-23S ribosomal RNA intergenic spacer, parti    | burgdorferi |
| FJ546538 | France      | Borrelia burgdorferi strain IPT135 5S-23S ribosomal RNA intergenic spacer,<br>part | burgdorferi |
| FJ546539 | France      | Borrelia burgdorferi strain IPT137 5S-23S ribosomal RNA intergenic spacer,<br>part | burgdorferi |
| FJ546540 | France      | Borrelia burgdorferi strain IPT190 5S-23S ribosomal RNA intergenic spacer,<br>part | burgdorferi |
| FJ546541 | France      | Borrelia burgdorferi strain IPT191 5S-23S ribosomal RNA intergenic spacer,<br>part | burgdorferi |
| FJ546542 | France      | Borrelia burgdorferi strain IPT193 5S-23S ribosomal RNA intergenic spacer,<br>part | burgdorferi |
| FJ546543 | France      | Borrelia garinii strain IPT195 5S-23S ribosomal RNA intergenic spacer, partial     | garinii     |
| FJ546544 | France      | Borrelia burgdorferi strain IPT198 5S-23S ribosomal RNA intergenic spacer,<br>part | burgdorferi |
| FJ546545 | Switzerland | Borrelia burgdorferi strain NE49 5S-23S ribosomal RNA intergenic spacer,<br>partia | burgdorferi |
| FJ546546 | Germany     | Borrelia burgdorferi strain Z41293 5S-23S ribosomal RNA intergenic spacer,<br>part | burgdorferi |
| FJ546547 | Germany     | Borrelia burgdorferi strain Z41493 5S-23S ribosomal RNA intergenic spacer,<br>part | burgdorferi |
| FJ810217 | china       | Borrelia afzelii strain JX1 5S-23S ribosomal RNA intergenic spacer, partial seq    | afzelii     |
| FJ976200 | Russia      | Borrelia afzelii strain NU06Rut05 5S-23S ribosomal RNA intergenic spacer,<br>parti | afzelii     |

|          |                |                                                                                        |             |
|----------|----------------|----------------------------------------------------------------------------------------|-------------|
| FJ976201 | Russia         | <i>Borrelia afzelii</i> strain NU74Glar05 5S-23S ribosomal RNA intergenic spacer, part | afzelii     |
| FN658707 | Italy          | <i>Borrelia lusitaniae</i> partial 23S-5S rRNA intergenic spacer, isolate IR-PTC 1.    | lusitaniae  |
| FN658708 | Italy          | <i>Borrelia lusitaniae</i> partial 23S-5S rRNA intergenic spacer, isolate IR-PTC 2.    | lusitaniae  |
| GQ178225 | Germany        | <i>Borrelia</i> sp. PFin 5S-23S ribosomal RNA intergenic spacer, partial sequence.     | bavariensis |
| GQ178226 | Germany        | <i>Borrelia</i> sp. PBN 5S-23S ribosomal RNA intergenic spacer, partial sequence.      | bavariensis |
| GQ178227 | Germany        | <i>Borrelia</i> sp. PScf 5S-23S ribosomal RNA intergenic spacer, partial sequence.     | bavariensis |
| GQ178229 | Germany        | <i>Borrelia</i> sp. PBaeI 5S-23S ribosomal RNA intergenic spacer, partial sequence.    | bavariensis |
| GQ387029 | Switzerland    | <i>Borrelia garinii</i> strain NE11 5S ribosomal RNA gene, partial sequence; 5S-23S ri | garinii     |
| GQ387030 | Switzerland    | <i>Borrelia garinii</i> strain NEd1 5S ribosomal RNA gene, partial sequence; 5S-23S ri | garinii     |
| GQ387031 | Switzerland    | <i>Borrelia garinii</i> strain NEd2 5S ribosomal RNA gene, partial sequence; 5S-23S ri | garinii     |
| GQ387032 | Switzerland    | <i>Borrelia garinii</i> strain NEd3 5S ribosomal RNA gene, partial sequence; 5S-23S ri | garinii     |
| GQ387033 | Switzerland    | <i>Borrelia garinii</i> strain NEd4 5S ribosomal RNA gene, partial sequence; 5S-23S ri | garinii     |
| GQ903682 | Switzerland    | <i>Borrelia bavariensis</i> strain NE2802 5S ribosomal RNA gene, partial sequence; 5S- | bavariensis |
| GQ903683 | Switzerland    | <i>Borrelia bavariensis</i> strain NE2806 5S ribosomal RNA gene, partial sequence; 5S- | bavariensis |
| GQ903685 | Switzerland    | <i>Borrelia garinii</i> strain NE4874 5S ribosomal RNA gene, partial sequence; 5S-23S  | garinii     |
| JF331066 | united kingdom | <i>Borrelia garinii</i> strain T1131 5S-23S ribosomal RNA intergenic spacer, partial s | garinii     |
| JF331067 | united kingdom | <i>Borrelia garinii</i> strain T1377 5S-23S ribosomal RNA intergenic spacer, partial s | garinii     |
| JF331098 | Iceland        | <i>Borrelia garinii</i> strain T2023 5S-23S ribosomal RNA intergenic spacer, partial s | garinii     |
| JF331099 | Iceland        | <i>Borrelia garinii</i> strain T2024 5S-23S ribosomal RNA intergenic spacer, partial s | garinii     |
| JF331101 | Russia         | <i>Borrelia garinii</i> strain T2645 5S-23S ribosomal RNA intergenic spacer, partial s | garinii     |
| JF331102 | Russia         | <i>Borrelia garinii</i> strain T2712 5S-23S ribosomal RNA intergenic spacer, partial s | garinii     |
| JF331103 | Russia         | <i>Borrelia garinii</i> strain T2885 5S-23S ribosomal RNA intergenic spacer, partial s | garinii     |
| JF331104 | Russia         | <i>Borrelia garinii</i> strain T2916 5S-23S ribosomal RNA intergenic spacer, partial s | garinii     |
| JF331105 | Russia         | <i>Borrelia garinii</i> strain T2929 5S-23S ribosomal RNA intergenic spacer, partial s | garinii     |
| JF331106 | Russia         | <i>Borrelia garinii</i> strain T2937 5S-23S ribosomal RNA intergenic spacer, partial s | garinii     |
| JF331107 | Russia         | <i>Borrelia garinii</i> strain T3221 5S-23S ribosomal RNA intergenic spacer, partial s | garinii     |
| JF331108 | France         | <i>Borrelia garinii</i> strain IPT28 5S-23S ribosomal RNA intergenic spacer, partial s | garinii     |
| JF331109 | France         | <i>Borrelia garinii</i> strain IPT114 5S-23S ribosomal RNA intergenic spacer, partial  | garinii     |
| JF331110 | France         | <i>Borrelia garinii</i> strain IPT156 5S-23S ribosomal RNA intergenic spacer, partial  | garinii     |
| JF331111 | France         | <i>Borrelia garinii</i> strain IPT167 5S-23S ribosomal RNA intergenic spacer, partial  | garinii     |



|          |             |                                                                                    |             |
|----------|-------------|------------------------------------------------------------------------------------|-------------|
| JF331112 | France      | Borrelia garinii strain IPT189 5S-23S ribosomal RNA intergenic spacer, partial     | garinii     |
| JF331113 | Ireland     | Borrelia garinii strain ConnA3/3 5S-23S ribosomal RNA intergenic spacer, partia    | garinii     |
| JF331114 | Sweden      | Borrelia garinii strain G25 5S-23S ribosomal RNA intergenic spacer, partial seq    | garinii     |
| JF331117 | Switzerland | Borrelia garinii strain CNE 83 5S-23S ribosomal RNA intergenic spacer, partial     | garinii     |
| KJ508861 | Finland     | Borrelia garinii isolate 3,1,1,6 Hrhov 5S-23S intergenic spacer, partial sequen    | garinii     |
| KJ508862 | Finland     | Borrelia garinii isolate 3,1,3,1 Hrhov 5S-23S intergenic spacer, partial sequen    | garinii     |
| KJ508863 | Finland     | Borrelia garinii isolate 5112 Hrhov 5S-23S intergenic spacer, partial sequence.    | garinii     |
| KJ508864 | Finland     | Borrelia garinii isolate 51212 Hrhov 5S-23S intergenic spacer, partial sequence    | garinii     |
| KJ508865 | Finland     | Borrelia garinii isolate 51214 Hrhov 5S-23S intergenic spacer, partial sequence    | garinii     |
| KJ577538 | Finland     | Borrelia garinii strain IO-TP-TW 5S-23S ribosomal RNA intergenic spacer,<br>partia | garinii     |
| L30119   | France      | Borrelia garinii (strain 20047) internal transcribed spacer.                       | garinii     |
| L30130   | Japan       | Borrelia garinii (strain NT29) internal transcribed spacer.                        | garinii     |
| L30131   | Portugal    | Borrelia burgdorferi (strain PotiB2) sensu lato internal transcribed spacer.       | lusitaniae  |
| L30132   | Portugal    | Borrelia burgdorferi (strain PotiB3) sensu lato internal transcribed spacer.       | lusitaniae  |
| X85745   | Italy       | B.burgdorferi 23S rRNA, 5S rRNA and 23S rRNA genes.                                | burgdorferi |
| Z77166   | Germany     | B.burgdorferi sensu stricto rrf-rrl internal transcribed spacer DNA (isolate Z7    | burgdorferi |
| Z77167   | Germany     | B.burgdorferi sensu stricto rrf-rrl internal transcribed spacer DNA (isolate Z5    | burgdorferi |
| Z77168   | Germany     | B.burgdorferi sensu stricto rrf-rrl internal transcribed spacer DNA (isolate Z5    | burgdorferi |
| Z77169   | Germany     | B.burgdorferi sensu stricto rrf-rrl internal transcribed spacer DNA (isolate Z5    | burgdorferi |
| Z77170   | Germany     | B.burgdorferi sensu stricto rrf-rrl internal transcribed spacer DNA (isolate Z4    | burgdorferi |
| Z77171   | Germany     | B.burgdorferi sensu stricto rrf-rrl internal transcribed spacer DNA (isolate Z5    | burgdorferi |
| Z77172   | Germany     | B.burgdorferi sensu stricto rrf-rrl internal transcribed spacer DNA (isolate Z4    | burgdorferi |
| Z77176   | Germany     | B.garinii rrf-rrl internal transcribed spacer DNA (isolate Z61592).                | garinii     |
| Z77177   | Germany     | B.garinii rrf-rrl internal transcribed spacer DNA (isolate Z71194).                | garinii     |
